# Supplementary material for: Chatbot-Delivered Online Intervention to Promote Seasonal Influenza Vaccination During the COVID-19 Pandemic: A Randomized Clinical Trial
Source: PubMed Central journal article supplement (PMC10495860; doi:10.1001/jamanetworkopen.2023.32568), 2023-09-11
Supplement: jamanetwopen-e2332568-s003.pdf [file jamanetwopen-e2332568-s003.pdf]

## Data Sharing Statement

Wang. Chatbot-Delivered Online Intervention to Promote Seasonal Influenza Vaccination During the COVID-19 Pandemic. *JAMA Netw Open*. Published September 11, 2023. doi:10.1001/jamanetworkopen.2023.32568

### Data

**Data available:** No

### Additional Information

**Explanation for why data not available:** The data presented in this study are available from the corresponding author upon request. The data are not publicly available as they contain sensitive personal information.
